# Supplementary material
Source: Copernicus journal article supplement (doi:10.5194/se-17-711-2026)
Supplement: Supplementary file [file se-17-711-2026-supplement-title-page.pdf › se-17-711-2026-supplement-title-page.pdf]

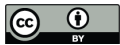

## *Supplement of*

# **Deciphering the crustal structure of the Lerma Valley (NW Argentina): a multi-method seismic investigation**

**Emilio J. M. Criado-Sutti et al.**

*Correspondence to:* Emilio J. M. Criado-Sutti (criadosutt@uni-potsdam.de)

- se-17-711-2026-supplement-title-page.pdf
- supplement\_v3
  - joint\_inversions
    - \* 01A\_zeckra
    - \* 02A\_zeckra
    - \* 03A\_zeckra
    - \* 04A\_zeckra
    - \* 05A\_zeckra
    - \* 07A\_zeckra
    - \* 09A\_zeckra
    - \* 10A\_zeckra
  - raypaths
    - \* raypaths.pdf
    - \* raypaths.svg
  - rfs\_combined
    - \* local
    - \* local\_hk\_p.csv
    - \* tele
    - \* tele\_hk\_p.csv

The copyright of individual parts of the supplement might differ from the article licence.
