# Supplementary material
Source: Copernicus journal article supplement (doi:10.5194/se-17-711-2026)

Group

Phase

2  
Periods [s]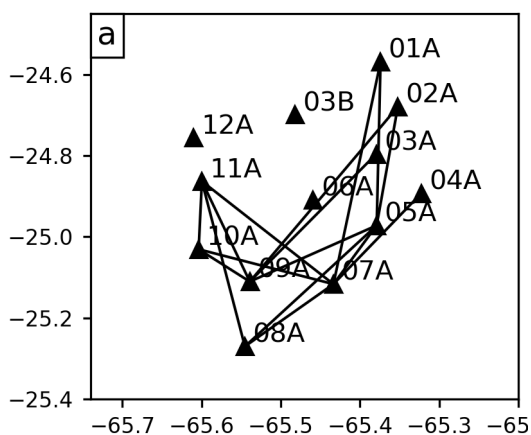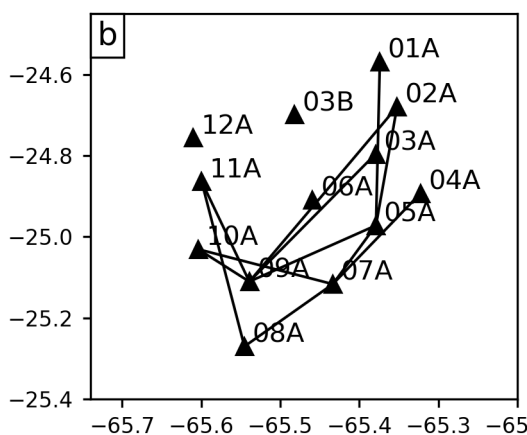

3

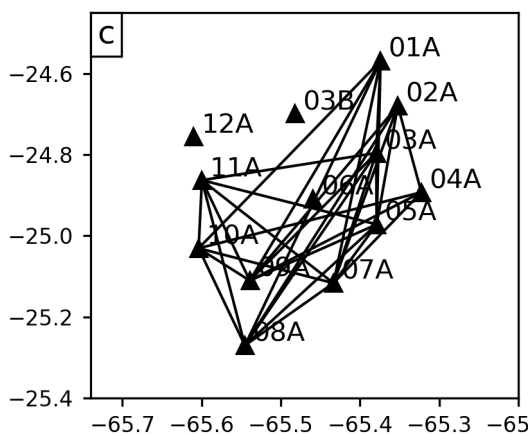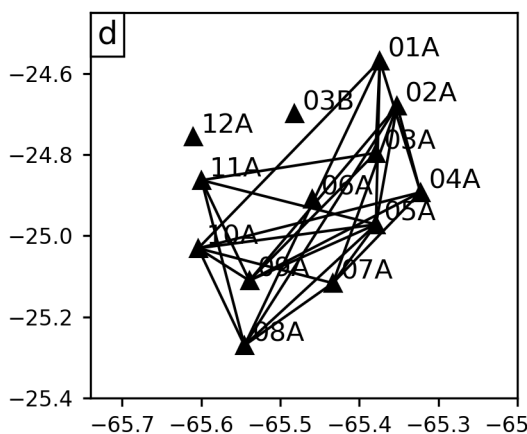

4

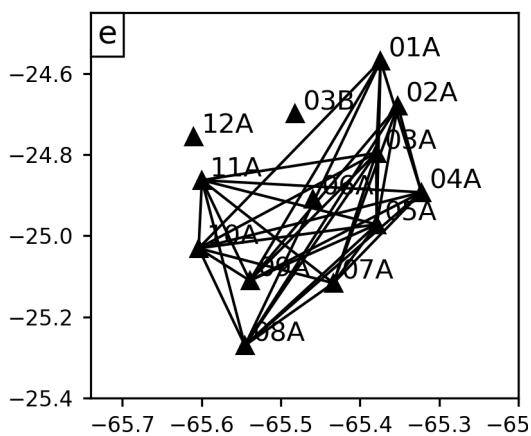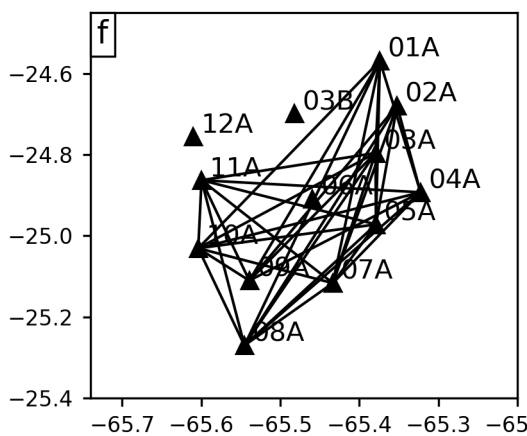

5

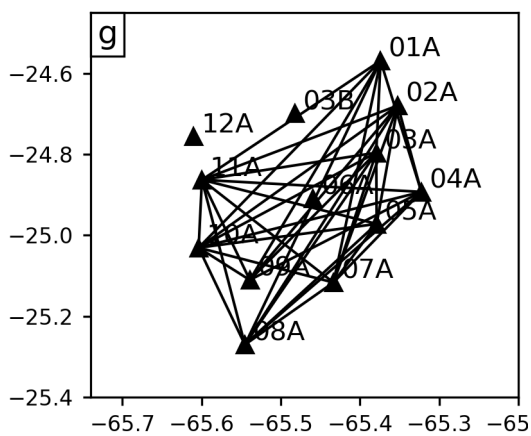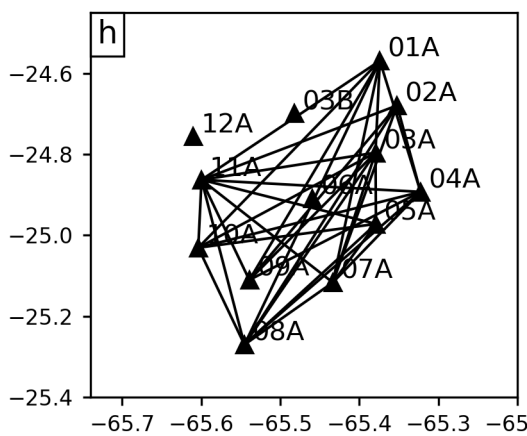

Supplement: Supplementary file 1 [file raypaths.pdf › supplement_v3/raypaths/raypaths.pdf]
